# Supplementary material for: Tlr4-mutant mice are resistant to acute alcohol-induced sterol-regulatory element binding protein activation and hepatic lipid accumulation
Source: PubMed Central journal article supplement (PMC5024165; doi:10.1038/srep33513), 2016-09-15
Supplement: srep33513-s1.pdf [file srep33513-s1.pdf]

## Supplementary information

*Tlr4*-mutant mice are resistant to acute alcohol-induced sterol-regulatory element binding protein activation and hepatic lipid accumulation

Zhi-Hui Zhang<sup>1, †</sup>, Xiao-Qian Liu<sup>1, †</sup>, Cheng Zhang<sup>1</sup>, Wei He<sup>2</sup>, Hua Wang<sup>1</sup>,  
Yuan-Hua Chen<sup>1</sup>, Xiao-Jing Liu<sup>2</sup>, Xi Chen<sup>2, \*</sup>, De-Xiang Xu<sup>1, \*</sup>

<sup>1</sup>Department of Toxicology, Anhui Medical University, Hefei, 230032, China

<sup>2</sup>First Affiliated Hospital, Anhui Medical University, Hefei, 230032, China

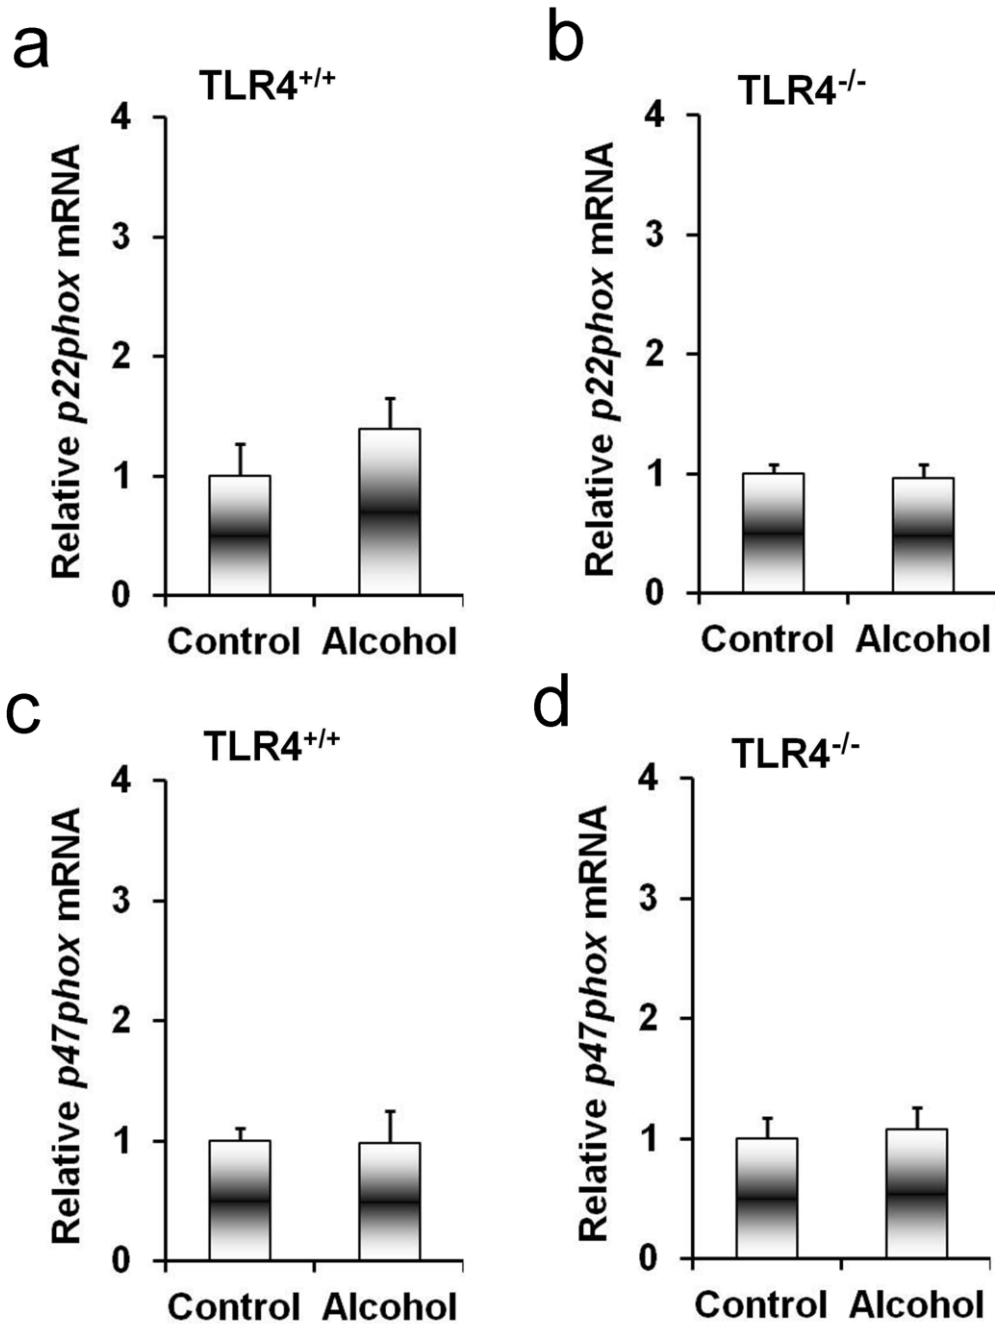

**Supplementary Figure S1. Effects of acute alcohol exposure on hepatic NADPH oxidase subunits.** All mice except controls were administered with ethanol (4 g/kg) by gavage. Liver tissue was collected at 2 h after alcohol. The expression of hepatic (a,b) *p22phox* and (c,d) *p47phox* mRNA was determined using real-time RT-PCR. Data were expressed as means  $\pm$  SEM (N=6).

**Supplementary Table S1. Oligonucleotide sequence of primers for real-time RT-PCR**

| Genes           | Forward (5'-3')            | Reverse (5'-3')        |
|-----------------|----------------------------|------------------------|
| <i>18S</i>      | GTAACCCGTTGAACCCATT        | CCATCCAATCGGTAGTAGCG   |
| <i>fas</i>      | CGCTCGGCTCGATGGCTCAG       | CCAGCACCACGGCATGCTCA   |
| <i>acc</i>      | CCGTTGGCCAAAACCTCTGGAGCTAA | GAGCTGACGGAGGCTGGTGACA |
| <i>scd-1</i>    | CGGTCATCCCATCGCCTGCTCT     | GTAGGCGAGTGGCGGAACTGC  |
| <i>dgat-2</i>   | GGATGCCTGTGCTTCGCGAGT      | GCTGCACCTCCCACCACGATG  |
| <i>irs-1</i>    | AAAAGCCACTTTCCCGCCCG       | CCACCAGCCGCCCAAATACCA  |
| <i>irs-2</i>    | GCGGAGTGTGTGGGGTCCA        | GGGGCTGGTAGCGCTTCACT   |
| <i>ho-1</i>     | CGTCACTTCGTCAGAGGCCTGC     | TCTGGGGTTTCCCTCGGGGTG  |
| <i>sod-2</i>    | AGCGAACGGCCGTGTTCTGAG      | AGCGCGCCATAGTCGTAAGGC  |
| <i>p67phox</i>  | CTGTGGTGTGAGCATACGGT       | TTAGGCTGAGGCTCCGTAGT   |
| <i>gp91phox</i> | GGGAACTGGGCTGTGAATGA       | CAGTGCTGACCCAAGGAGTT   |
| <i>p22phox</i>  | AGTGAGGACTTGCGAAGTGG       | GAGTAGGCGCCGAAATACCA   |
| <i>p47phox</i>  | CCAGGGCACTCTCACTGAATA      | ATCAGGCCGCACTTTGAAGAA  |

**Supplementary Table S2. The effects of acute alcohol exposure on mRNA level of housekeeping genes in mouse liver**

| Housekeeping genes | Cycle numbers |            | P value |
|--------------------|---------------|------------|---------|
|                    | Control       | Alcohol    |         |
| <i>β-actin</i>     | 24.39±0.59    | 22.08±0.52 | 0.001   |
| <i>Gapdh</i>       | 17.45±0.82    | 15.92±0.41 | 0.016   |
| <i>18S</i>         | 10.41±0.17    | 10.49±0.25 | 0.589   |

All mice except controls were administered with ethanol (4 g/kg) by gavage. Liver tissue was collected at 6 h after alcohol. The expression of hepatic housekeeping genes were determined using real-time RT-PCR. Data were expressed as means ± SEM (N=6).
